# Supplementary material for: miRA: adaptable novel miRNA identification in plants using small RNA sequencing data
Source: PubMed Central journal article supplement (PMC4635600; doi:10.1186/s12859-015-0798-3), 2015-11-05
Supplement: 12859_2015_798_MOESM1_ESM.pdf [file 12859_2015_798_MOESM1_ESM.pdf]

## miRA default parameters

Table S1: List of miRA default configuration parameters for different organisms (green algae and plants). Details about the various parameters are given in section **Method** of the main paper. See the miRA help (miRA --help) for details on how to call miRA for different organisms.

|                               | Green algae | Plants |
|-------------------------------|-------------|--------|
| openmp_thread_count           | 10          | 10     |
| cluster_gap_size              | 10          | 10     |
| cluster_min_reads             | 10          | 10     |
| cluster_flank_size            | 200         | 200    |
| cluster_max_length            | 2000        | 2000   |
| min_precursor_length          | 0           | 0      |
| max_precursor_length          | 0           | 0      |
| max_mfe_per_nt                | -0.30       | -0.20  |
| max_hairpin_count             | 4           | 4      |
| min_double_strand_length      | 18          | 18     |
| permutation_count             | 100         | 100    |
| max_pvalue                    | 0.01        | 0.01   |
| min_coverage                  | 0.01        | 0.01   |
| min_paired_fraction           | 0.55        | 0.55   |
| min_duplex_length             | 18          | 18     |
| max_duplex_length             | 30          | 30     |
| allow_three_mismatches        | 1           | 1      |
| allow_two_terminal_mismatches | 0           | 0      |

# Statistical significance testing

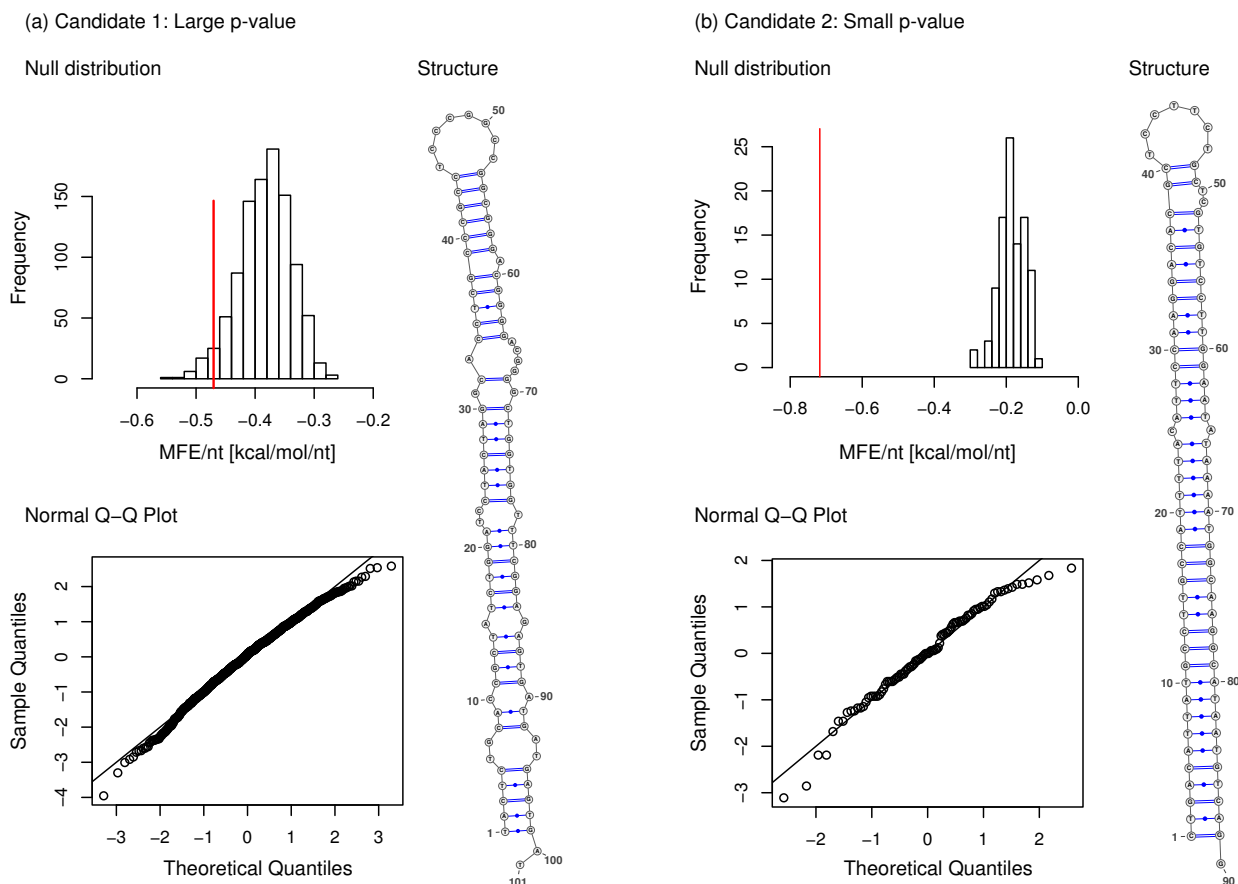

Figure S1: Two candidate miRNA precursors which pass the species-characteristic secondary structure constraints. Candidates that fail and pass the statistical significance test are shown in the left (a) and right (b) panels, respectively. For each candidate, (i) the per-nucleotide minimum free energy (MFE/nt) null distribution derived from random sequences with the same mono-nucleotide distribution including the candidate structure MFE/nt (vertical red line), (ii) the *QQ* plot for a normal distribution of MFE/nt, and (iii) the candidate structure are shown.

## Flux simulator input parameters

Table S2: Flux Simulator input file used for generating *Chlamydomonas reinhardtii* mRNA background expression. Resulting reads were added to the simulated expression of 20 known miRNAs. For details see section **Results and discussion** from the main paper.

|                |                     |
|----------------|---------------------|
| REF_FILE_NAME  | cre_transcripts.gtf |
| GEN_DIR        | scaffolds/          |
| READ_LENGTH    | 35                  |
| TSS_MEAN       | NaN                 |
| READ_NUMBER    | 15000000            |
| NB_MOLECULES   | 5000000             |
| GC_SD          | 0.1                 |
| GC_MEAN        | 0.5                 |
| SIZE_SAMPLING  | AC                  |
| FRAG_SUBSTRATE | RNA                 |
| FRAG_METHOD    | UR                  |
| FRAG_EZ_MOTIF  | NlaIII              |
| PAIRED_END     | false               |
| FASTA          | true                |
| TMP_DIR        | tmp_folder/         |

## Full list of identified miRNAs in *Chlamydomonas reinhardtii*

Table S3: Full list of 281 identified miRNAs in *Chlamydomonas reinhardtii* from miRA. Corresponding matches from Molnar et al. [1] are indicated. For details, see section **Results and discussion** in the main paper.

| Name       | Scaffold     | Start   | Stop    | Match in Molnar et al. | Strand |
|------------|--------------|---------|---------|------------------------|--------|
| cre-mir-1  | scaffold_1   | 186331  | 186654  | cr.01795s              | plus   |
| cre-mir-2  | scaffold_1   | 757123  | 757188  | –                      | –      |
| cre-mir-3  | scaffold_1   | 1273031 | 1273132 | –                      | –      |
| cre-mir-4  | scaffold_1   | 1804913 | 1805129 | cr.01801s              | plus   |
| cre-mir-5  | scaffold_1   | 2346710 | 2346948 | –                      | –      |
| cre-mir-6  | scaffold_1   | 2363527 | 2363598 | –                      | –      |
| cre-mir-7  | scaffold_1   | 3204620 | 3204757 | cr.01807s              | plus   |
| cre-mir-8  | scaffold_1   | 3248133 | 3248410 | –                      | –      |
| cre-mir-9  | scaffold_1   | 3943005 | 3943304 | –                      | –      |
| cre-mir-10 | scaffold_1   | 3956391 | 3956682 | –                      | –      |
| cre-mir-11 | scaffold_1   | 5142984 | 5143102 | –                      | –      |
| cre-mir-12 | scaffold_1   | 5256108 | 5256473 | cr.01820s              | plus   |
| cre-mir-13 | scaffold_1   | 5256706 | 5257034 | cr.01821               | plus   |
| cre-mir-14 | scaffold_1   | 5463623 | 5463805 | –                      | –      |
| cre-mir-15 | scaffold_1   | 6178959 | 6179370 | –                      | –      |
| cre-mir-16 | scaffold_1   | 6221162 | 6221672 | –                      | –      |
| cre-mir-17 | scaffold_1   | 6352152 | 6352512 | cr.01824s              | plus   |
| cre-mir-18 | scaffold_10  | 488235  | 488448  | –                      | –      |
| cre-mir-19 | scaffold_10  | 543905  | 544044  | –                      | –      |
| cre-mir-20 | scaffold_10  | 1416464 | 1417013 | cr.01843s              | plus   |
| cre-mir-21 | scaffold_10  | 1471975 | 1472151 | –                      | –      |
| cre-mir-22 | scaffold_10  | 1589337 | 1589514 | –                      | –      |
| cre-mir-23 | scaffold_10  | 1711642 | 1712044 | cr.01846               | plus   |
| cre-mir-24 | scaffold_10  | 1934031 | 1934143 | cr.01847               | plus   |
| cre-mir-25 | scaffold_10  | 1935777 | 1935927 | cr.01848               | plus   |
| cre-mir-26 | scaffold_10  | 2110160 | 2110214 | –                      | –      |
| cre-mir-27 | scaffold_10  | 2282656 | 2282782 | cr.01854s              | plus   |
| cre-mir-28 | scaffold_102 | 95325   | 95708   | –                      | –      |
| cre-mir-29 | scaffold_105 | 107839  | 107986  | –                      | –      |
| cre-mir-30 | scaffold_11  | 454794  | 455016  | –                      | –      |
| cre-mir-31 | scaffold_11  | 559504  | 559684  | –                      | –      |
| cre-mir-32 | scaffold_11  | 562070  | 562299  | –                      | –      |
| cre-mir-33 | scaffold_11  | 794783  | 794856  | –                      | –      |
| cre-mir-34 | scaffold_11  | 1452352 | 1452689 | –                      | –      |
| cre-mir-35 | scaffold_11  | 1700088 | 1700192 | –                      | –      |
| cre-mir-36 | scaffold_110 | 47995   | 48144   | –                      | –      |
| cre-mir-37 | scaffold_117 | 75991   | 76413   | –                      | –      |
| cre-mir-38 | scaffold_118 | 47312   | 47371   | –                      | –      |
| cre-mir-39 | scaffold_12  | 1259418 | 1259651 | –                      | –      |
| cre-mir-40 | scaffold_12  | 1442771 | 1442841 | –                      | –      |
| cre-mir-41 | scaffold_12  | 1460015 | 1460216 | –                      | –      |
| cre-mir-42 | scaffold_12  | 1593161 | 1593266 | –                      | –      |
| cre-mir-43 | scaffold_12  | 1998775 | 1998907 | cr.01969               | plus   |

Table S3 – *Continued from previous page*

| Name       | Scaffold     | Start   | Stop    | Match in Molnar et al. | Strand |
|------------|--------------|---------|---------|------------------------|--------|
| cre-mir-44 | scaffold_12  | 2089149 | 2089286 | –                      | –      |
| cre-mir-45 | scaffold_13  | 205866  | 206003  | –                      | –      |
| cre-mir-46 | scaffold_14  | 1133579 | 1133683 | –                      | –      |
| cre-mir-47 | scaffold_14  | 1390988 | 1391181 | –                      | –      |
| cre-mir-48 | scaffold_14  | 1502891 | 1503016 | –                      | –      |
| cre-mir-49 | scaffold_149 | 19446   | 19524   | –                      | –      |
| cre-mir-50 | scaffold_15  | 112666  | 113203  | –                      | –      |
| cre-mir-51 | scaffold_15  | 409124  | 409361  | –                      | –      |
| cre-mir-52 | scaffold_15  | 416748  | 417061  | –                      | –      |
| cre-mir-53 | scaffold_15  | 1291875 | 1292013 | cr.02052               | plus   |
| cre-mir-54 | scaffold_15  | 1918566 | 1918689 | cr.02057               | minus  |
| cre-mir-55 | scaffold_15  | 2058290 | 2058660 | cr.02058               | plus   |
| cre-mir-56 | scaffold_16  | 173311  | 173519  | –                      | –      |
| cre-mir-57 | scaffold_16  | 815806  | 816012  | –                      | –      |
| cre-mir-58 | scaffold_16  | 820250  | 820665  | –                      | –      |
| cre-mir-59 | scaffold_16  | 837532  | 837807  | –                      | –      |
| cre-mir-60 | scaffold_16  | 992901  | 993132  | –                      | –      |
| cre-mir-61 | scaffold_16  | 1855015 | 1855075 | –                      | –      |
| cre-mir-62 | scaffold_16  | 1919700 | 1919969 | cr.02074               | plus   |
| cre-mir-63 | scaffold_16  | 1920407 | 1920562 | –                      | –      |
| cre-mir-64 | scaffold_17  | 363273  | 363376  | –                      | –      |
| cre-mir-65 | scaffold_17  | 700848  | 701344  | –                      | –      |
| cre-mir-66 | scaffold_17  | 755524  | 755590  | –                      | –      |
| cre-mir-67 | scaffold_17  | 966146  | 966290  | cr.02088               | plus   |
| cre-mir-68 | scaffold_17  | 1366243 | 1366365 | –                      | –      |
| cre-mir-69 | scaffold_17  | 1394541 | 1394862 | –                      | –      |
| cre-mir-70 | scaffold_17  | 1522001 | 1522062 | –                      | –      |
| cre-mir-71 | scaffold_17  | 1888384 | 1888558 | –                      | –      |
| cre-mir-72 | scaffold_17  | 1980044 | 1980097 | –                      | –      |
| cre-mir-73 | scaffold_17  | 2045477 | 2045616 | –                      | –      |
| cre-mir-74 | scaffold_18  | 251264  | 251407  | cr.02116               | plus   |
| cre-mir-75 | scaffold_18  | 360474  | 360590  | –                      | –      |
| cre-mir-76 | scaffold_18  | 697237  | 697344  | –                      | –      |
| cre-mir-77 | scaffold_18  | 1349744 | 1349827 | –                      | –      |
| cre-mir-78 | scaffold_18  | 1845607 | 1845672 | –                      | –      |
| cre-mir-79 | scaffold_18  | 1879867 | 1880149 | –                      | –      |
| cre-mir-80 | scaffold_19  | 455194  | 455331  | –                      | –      |
| cre-mir-81 | scaffold_19  | 459639  | 459854  | cr.02139s              | plus   |
| cre-mir-82 | scaffold_2   | 982408  | 982634  | –                      | –      |
| cre-mir-83 | scaffold_2   | 1742481 | 1742590 | –                      | –      |
| cre-mir-84 | scaffold_2   | 2089105 | 2089504 | –                      | –      |
| cre-mir-85 | scaffold_2   | 2333354 | 2333453 | –                      | –      |
| cre-mir-86 | scaffold_2   | 3550938 | 3551241 | –                      | –      |
| cre-mir-87 | scaffold_20  | 46389   | 46762   | –                      | –      |
| cre-mir-88 | scaffold_20  | 352885  | 353199  | –                      | –      |
| cre-mir-89 | scaffold_20  | 831488  | 831722  | –                      | –      |
| cre-mir-90 | scaffold_20  | 917613  | 917757  | –                      | –      |
| cre-mir-91 | scaffold_20  | 1015174 | 1015351 | –                      | –      |

Table S3 – *Continued from previous page*

| Name        | Scaffold     | Start   | Stop    | Match in Molnar et al. | Strand |
|-------------|--------------|---------|---------|------------------------|--------|
| cre-mir-92  | scaffold_20  | 1892111 | 1892158 | –                      | –      |
| cre-mir-93  | scaffold_21  | 332971  | 333087  | –                      | –      |
| cre-mir-94  | scaffold_21  | 671512  | 671608  | –                      | –      |
| cre-mir-95  | scaffold_21  | 673629  | 673862  | –                      | –      |
| cre-mir-96  | scaffold_21  | 915988  | 916199  | –                      | –      |
| cre-mir-97  | scaffold_21  | 1743159 | 1743380 | –                      | –      |
| cre-mir-98  | scaffold_213 | 20096   | 20316   | cr.02256               | plus   |
| cre-mir-99  | scaffold_214 | 7189    | 7760    | cr.02257               | minus  |
| cre-mir-100 | scaffold_214 | 8982    | 9475    | –                      | –      |
| cre-mir-101 | scaffold_214 | 10221   | 10462   | –                      | –      |
| cre-mir-102 | scaffold_22  | 535228  | 535555  | –                      | –      |
| cre-mir-103 | scaffold_22  | 1143939 | 1144217 | –                      | –      |
| cre-mir-104 | scaffold_22  | 1315827 | 1315964 | –                      | –      |
| cre-mir-105 | scaffold_23  | 107220  | 107452  | –                      | –      |
| cre-mir-106 | scaffold_23  | 772588  | 772816  | –                      | –      |
| cre-mir-107 | scaffold_23  | 884406  | 884532  | –                      | –      |
| cre-mir-108 | scaffold_23  | 1270776 | 1271060 | –                      | –      |
| cre-mir-109 | scaffold_24  | 753254  | 753395  | –                      | –      |
| cre-mir-110 | scaffold_24  | 885605  | 885678  | –                      | –      |
| cre-mir-111 | scaffold_24  | 1611658 | 1611774 | –                      | –      |
| cre-mir-112 | scaffold_25  | 138596  | 138665  | –                      | –      |
| cre-mir-113 | scaffold_25  | 325702  | 325799  | –                      | –      |
| cre-mir-114 | scaffold_25  | 482296  | 482994  | –                      | –      |
| cre-mir-115 | scaffold_25  | 996780  | 996956  | –                      | –      |
| cre-mir-116 | scaffold_26  | 263656  | 263745  | –                      | –      |
| cre-mir-117 | scaffold_26  | 422443  | 422543  | –                      | –      |
| cre-mir-118 | scaffold_27  | 309617  | 309830  | –                      | –      |
| cre-mir-119 | scaffold_27  | 990904  | 991156  | –                      | –      |
| cre-mir-120 | scaffold_28  | 299413  | 299481  | –                      | –      |
| cre-mir-121 | scaffold_28  | 688078  | 688278  | –                      | –      |
| cre-mir-122 | scaffold_28  | 775440  | 775782  | cr.02358s              | plus   |
| cre-mir-123 | scaffold_28  | 1007553 | 1007626 | –                      | –      |
| cre-mir-124 | scaffold_28  | 1039943 | 1040321 | cr.02359s              | plus   |
| cre-mir-125 | scaffold_28  | 1143676 | 1143832 | –                      | –      |
| cre-mir-126 | scaffold_28  | 1424196 | 1424463 | –                      | –      |
| cre-mir-127 | scaffold_283 | 8607    | 8746    | –                      | –      |
| cre-mir-128 | scaffold_29  | 1174253 | 1174592 | –                      | –      |
| cre-mir-129 | scaffold_3   | 93567   | 93760   | –                      | –      |
| cre-mir-130 | scaffold_3   | 167739  | 167954  | cr.02386               | minus  |
| cre-mir-131 | scaffold_3   | 498410  | 498759  | –                      | –      |
| cre-mir-132 | scaffold_3   | 1053384 | 1053864 | –                      | –      |
| cre-mir-133 | scaffold_3   | 1150235 | 1150305 | –                      | –      |
| cre-mir-134 | scaffold_3   | 1445075 | 1445122 | –                      | –      |
| cre-mir-135 | scaffold_3   | 1535256 | 1535545 | –                      | –      |
| cre-mir-136 | scaffold_3   | 1992199 | 1992410 | –                      | –      |
| cre-mir-137 | scaffold_3   | 3062401 | 3062624 | –                      | –      |
| cre-mir-138 | scaffold_30  | 1011524 | 1011689 | –                      | –      |
| cre-mir-139 | scaffold_31  | 329920  | 330518  | –                      | –      |

Table S3 – *Continued from previous page*

| Name        | Scaffold     | Start   | Stop    | Match in Molnar et al. | Strand |
|-------------|--------------|---------|---------|------------------------|--------|
| cre-mir-140 | scaffold_31  | 332427  | 333025  | –                      | –      |
| cre-mir-141 | scaffold_31  | 368851  | 369227  | –                      | –      |
| cre-mir-142 | scaffold_31  | 661225  | 661795  | –                      | –      |
| cre-mir-143 | scaffold_31  | 1053150 | 1053211 | –                      | –      |
| cre-mir-144 | scaffold_310 | 6806    | 6879    | –                      | –      |
| cre-mir-145 | scaffold_32  | 259596  | 259776  | cr.02446               | plus   |
| cre-mir-146 | scaffold_32  | 655437  | 655645  | –                      | –      |
| cre-mir-147 | scaffold_33  | 258259  | 258700  | –                      | –      |
| cre-mir-148 | scaffold_330 | 492     | 543     | –                      | –      |
| cre-mir-149 | scaffold_34  | 572892  | 572953  | –                      | –      |
| cre-mir-150 | scaffold_35  | 109405  | 110018  | –                      | –      |
| cre-mir-151 | scaffold_35  | 818350  | 818635  | –                      | –      |
| cre-mir-152 | scaffold_35  | 929772  | 930108  | cr.02466               | minus  |
| cre-mir-153 | scaffold_35  | 1049290 | 1049550 | –                      | –      |
| cre-mir-154 | scaffold_36  | 260699  | 260805  | cr.02472s              | plus   |
| cre-mir-155 | scaffold_36  | 503022  | 503133  | –                      | –      |
| cre-mir-156 | scaffold_36  | 578006  | 578190  | cr.02473               | minus  |
| cre-mir-157 | scaffold_36  | 724530  | 724698  | –                      | –      |
| cre-mir-158 | scaffold_37  | 408573  | 408860  | –                      | –      |
| cre-mir-159 | scaffold_37  | 590564  | 591095  | –                      | –      |
| cre-mir-160 | scaffold_37  | 784910  | 784984  | –                      | –      |
| cre-mir-161 | scaffold_38  | 359786  | 359971  | –                      | –      |
| cre-mir-162 | scaffold_38  | 360380  | 360531  | –                      | –      |
| cre-mir-163 | scaffold_38  | 790373  | 790538  | –                      | –      |
| cre-mir-164 | scaffold_38  | 857644  | 857925  | –                      | –      |
| cre-mir-165 | scaffold_38  | 926469  | 926660  | –                      | –      |
| cre-mir-166 | scaffold_39  | 459417  | 459469  | –                      | –      |
| cre-mir-167 | scaffold_39  | 517788  | 517881  | –                      | –      |
| cre-mir-168 | scaffold_39  | 656178  | 656390  | –                      | –      |
| cre-mir-169 | scaffold_39  | 965155  | 965214  | –                      | –      |
| cre-mir-170 | scaffold_4   | 752685  | 753098  | –                      | –      |
| cre-mir-171 | scaffold_4   | 983312  | 983390  | –                      | –      |
| cre-mir-172 | scaffold_4   | 1255613 | 1255912 | –                      | –      |
| cre-mir-173 | scaffold_4   | 1655055 | 1655110 | –                      | –      |
| cre-mir-174 | scaffold_4   | 1802578 | 1802654 | –                      | –      |
| cre-mir-175 | scaffold_4   | 2037823 | 2038076 | cr.02513s              | plus   |
| cre-mir-176 | scaffold_4   | 2546564 | 2546731 | –                      | –      |
| cre-mir-177 | scaffold_4   | 2555125 | 2555171 | –                      | –      |
| cre-mir-178 | scaffold_4   | 2849916 | 2850081 | –                      | –      |
| cre-mir-179 | scaffold_4   | 2941648 | 2941864 | –                      | –      |
| cre-mir-180 | scaffold_4   | 2978267 | 2978438 | –                      | –      |
| cre-mir-181 | scaffold_40  | 432517  | 432657  | cr.02546               | minus  |
| cre-mir-182 | scaffold_40  | 888731  | 889054  | –                      | –      |
| cre-mir-183 | scaffold_41  | 199129  | 199234  | –                      | –      |
| cre-mir-184 | scaffold_41  | 731110  | 731167  | –                      | –      |
| cre-mir-185 | scaffold_41  | 760648  | 760974  | –                      | –      |
| cre-mir-186 | scaffold_42  | 336177  | 336688  | –                      | –      |
| cre-mir-187 | scaffold_42  | 638045  | 638103  | –                      | –      |

Table S3 – *Continued from previous page*

| Name        | Scaffold    | Start   | Stop    | Match in Molnar et al. | Strand |
|-------------|-------------|---------|---------|------------------------|--------|
| cre-mir-188 | scaffold_44 | 373373  | 373744  | –                      | –      |
| cre-mir-189 | scaffold_45 | 135429  | 135843  | –                      | –      |
| cre-mir-190 | scaffold_45 | 178605  | 178988  | –                      | –      |
| cre-mir-191 | scaffold_45 | 746353  | 746421  | –                      | –      |
| cre-mir-192 | scaffold_46 | 42505   | 42655   | –                      | –      |
| cre-mir-193 | scaffold_46 | 613342  | 613453  | cr.02586               | plus   |
| cre-mir-194 | scaffold_47 | 152162  | 152389  | –                      | –      |
| cre-mir-195 | scaffold_48 | 281475  | 281919  | –                      | –      |
| cre-mir-196 | scaffold_48 | 283336  | 283677  | –                      | –      |
| cre-mir-197 | scaffold_49 | 113991  | 114355  | –                      | –      |
| cre-mir-198 | scaffold_5  | 4526    | 4829    | cr.02603               | plus   |
| cre-mir-199 | scaffold_5  | 218028  | 218214  | –                      | –      |
| cre-mir-200 | scaffold_5  | 339928  | 340221  | –                      | –      |
| cre-mir-201 | scaffold_5  | 398845  | 399066  | –                      | –      |
| cre-mir-202 | scaffold_5  | 455793  | 456209  | –                      | –      |
| cre-mir-203 | scaffold_5  | 951388  | 951566  | –                      | –      |
| cre-mir-204 | scaffold_5  | 1129922 | 1130321 | –                      | –      |
| cre-mir-205 | scaffold_5  | 1507942 | 1508008 | –                      | –      |
| cre-mir-206 | scaffold_5  | 2618828 | 2618992 | –                      | –      |
| cre-mir-207 | scaffold_5  | 2621429 | 2621749 | –                      | –      |
| cre-mir-208 | scaffold_50 | 21808   | 21978   | –                      | –      |
| cre-mir-209 | scaffold_51 | 171276  | 171451  | –                      | –      |
| cre-mir-210 | scaffold_51 | 235125  | 235474  | –                      | –      |
| cre-mir-211 | scaffold_51 | 445199  | 445472  | –                      | –      |
| cre-mir-212 | scaffold_51 | 446731  | 447170  | –                      | –      |
| cre-mir-213 | scaffold_54 | 61882   | 62156   | –                      | –      |
| cre-mir-214 | scaffold_54 | 88757   | 89154   | –                      | –      |
| cre-mir-215 | scaffold_54 | 327842  | 327897  | –                      | –      |
| cre-mir-216 | scaffold_54 | 459657  | 459746  | –                      | –      |
| cre-mir-217 | scaffold_57 | 85276   | 85699   | –                      | –      |
| cre-mir-218 | scaffold_58 | 46062   | 46224   | –                      | –      |
| cre-mir-219 | scaffold_58 | 151233  | 151457  | –                      | –      |
| cre-mir-220 | scaffold_58 | 451346  | 451615  | –                      | –      |
| cre-mir-221 | scaffold_6  | 18946   | 19110   | –                      | –      |
| cre-mir-222 | scaffold_6  | 90215   | 90327   | –                      | –      |
| cre-mir-223 | scaffold_6  | 118493  | 118744  | cr.02714               | minus  |
| cre-mir-224 | scaffold_6  | 231365  | 231442  | –                      | –      |
| cre-mir-225 | scaffold_6  | 1014100 | 1014405 | cr.02719               | minus  |
| cre-mir-226 | scaffold_6  | 1045064 | 1045234 | –                      | –      |
| cre-mir-227 | scaffold_6  | 1649748 | 1649850 | –                      | –      |
| cre-mir-228 | scaffold_6  | 1906386 | 1906522 | –                      | –      |
| cre-mir-229 | scaffold_6  | 1960286 | 1960773 | –                      | –      |
| cre-mir-230 | scaffold_6  | 1969723 | 1970208 | cr.02725               | plus   |
| cre-mir-231 | scaffold_6  | 2002313 | 2002494 | –                      | –      |
| cre-mir-232 | scaffold_60 | 59802   | 60001   | –                      | –      |
| cre-mir-233 | scaffold_60 | 281895  | 282025  | –                      | –      |
| cre-mir-234 | scaffold_60 | 389236  | 389326  | –                      | –      |
| cre-mir-235 | scaffold_61 | 269819  | 269902  | –                      | –      |



Table S3 – *Continued from previous page*

| Name        | Scaffold     | Start   | Stop    | Match in Molnar et al. | Strand |
|-------------|--------------|---------|---------|------------------------|--------|
| cre-mir-236 | scaffold_61  | 326060  | 326121  | –                      | –      |
| cre-mir-237 | scaffold_61  | 440245  | 440306  | –                      | –      |
| cre-mir-238 | scaffold_64  | 413149  | 413312  | –                      | –      |
| cre-mir-239 | scaffold_65  | 146187  | 146301  | –                      | –      |
| cre-mir-240 | scaffold_656 | 7874    | 8068    | –                      | –      |
| cre-mir-241 | scaffold_66  | 49053   | 49145   | –                      | –      |
| cre-mir-242 | scaffold_7   | 151785  | 151895  | –                      | –      |
| cre-mir-243 | scaffold_7   | 773094  | 773179  | cr.02798s              | plus   |
| cre-mir-244 | scaffold_7   | 1602863 | 1603103 | –                      | –      |
| cre-mir-245 | scaffold_7   | 1694980 | 1695239 | –                      | –      |
| cre-mir-246 | scaffold_7   | 2198524 | 2198638 | –                      | –      |
| cre-mir-247 | scaffold_7   | 2270791 | 2270841 | –                      | –      |
| cre-mir-248 | scaffold_70a | 57279   | 57487   | –                      | –      |
| cre-mir-249 | scaffold_70a | 208269  | 208445  | –                      | –      |
| cre-mir-250 | scaffold_71  | 96196   | 96385   | –                      | –      |
| cre-mir-251 | scaffold_71  | 111419  | 111539  | –                      | –      |
| cre-mir-252 | scaffold_73  | 111351  | 111594  | –                      | –      |
| cre-mir-253 | scaffold_73  | 286771  | 286851  | –                      | –      |
| cre-mir-254 | scaffold_74  | 277642  | 277897  | –                      | –      |
| cre-mir-255 | scaffold_75  | 225319  | 225637  | –                      | –      |
| cre-mir-256 | scaffold_75  | 274385  | 274871  | –                      | –      |
| cre-mir-257 | scaffold_75  | 284493  | 284781  | cr.02862s              | plus   |
| cre-mir-258 | scaffold_75  | 368389  | 368849  | –                      | –      |
| cre-mir-259 | scaffold_75  | 370855  | 371138  | cr.02865               | plus   |
| cre-mir-260 | scaffold_76  | 73490   | 73687   | –                      | –      |
| cre-mir-261 | scaffold_76  | 233226  | 233364  | cr.02870               | plus   |
| cre-mir-262 | scaffold_78  | 77581   | 77727   | –                      | –      |
| cre-mir-263 | scaffold_79  | 18267   | 18321   | –                      | –      |
| cre-mir-264 | scaffold_79  | 84940   | 85003   | –                      | –      |
| cre-mir-265 | scaffold_8   | 207172  | 207243  | –                      | –      |
| cre-mir-266 | scaffold_8   | 1493157 | 1493214 | –                      | –      |
| cre-mir-267 | scaffold_8   | 1677898 | 1678064 | –                      | –      |
| cre-mir-268 | scaffold_8   | 1966126 | 1966230 | –                      | –      |
| cre-mir-269 | scaffold_8   | 1966760 | 1966864 | –                      | –      |
| cre-mir-270 | scaffold_8   | 2058567 | 2058738 | –                      | –      |
| cre-mir-271 | scaffold_80  | 14465   | 15082   | –                      | –      |
| cre-mir-272 | scaffold_84  | 96029   | 96378   | –                      | –      |
| cre-mir-273 | scaffold_891 | 3252    | 3336    | –                      | –      |
| cre-mir-274 | scaffold_9   | 7432    | 7567    | –                      | –      |
| cre-mir-275 | scaffold_9   | 1364309 | 1364411 | –                      | –      |
| cre-mir-276 | scaffold_9   | 2043913 | 2043958 | –                      | –      |
| cre-mir-277 | scaffold_90  | 23732   | 23886   | –                      | –      |
| cre-mir-278 | scaffold_94  | 194272  | 194410  | –                      | –      |
| cre-mir-279 | scaffold_95  | 98807   | 98950   | –                      | –      |
| cre-mir-280 | scaffold_95  | 143231  | 143461  | –                      | –      |
| cre-mir-281 | scaffold_95  | 156838  | 157003  | –                      | –      |

## Examples of complex miRNA precursors in *Chlamydomonas reinhardtii*

Figure S2: Examples of complex miRNA precursors in *Chlamydomonas reinhardtii*. For details, see section **Results and discussion** in the main paper. Precursors often show expression profiles consistent with the production of multiple mature miRNA from the same precursor (example 1), as well as secondary structures containing additional hairpin loops (example 2). Coverage plots show the per-nucleotide read coverage for the plus (in red) and minus strand (in blue). Genomic positions and positions along the precursor sequence are given separately along the bottom and top x-axes. In the secondary structure plots, the primary (most strongly expressed) mature miRNA sequence is highlighted in red, and its complementary star sequence in blue.

# Example 1: mir-cre-9

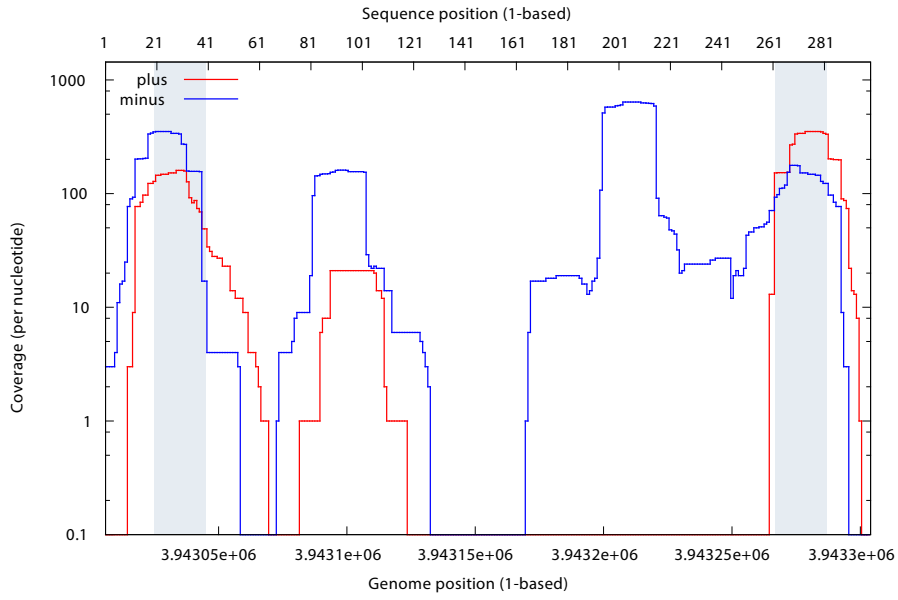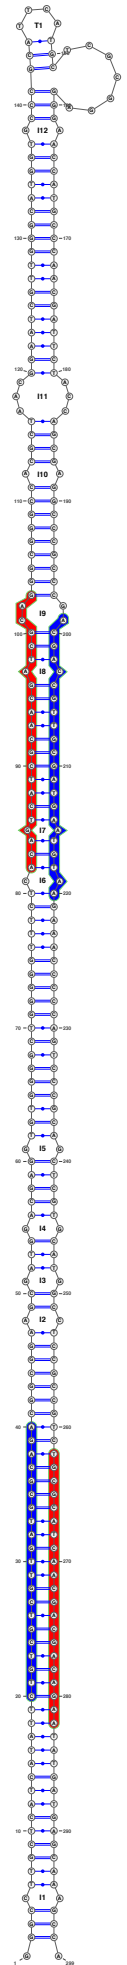

# Example 2: cre-mir-14

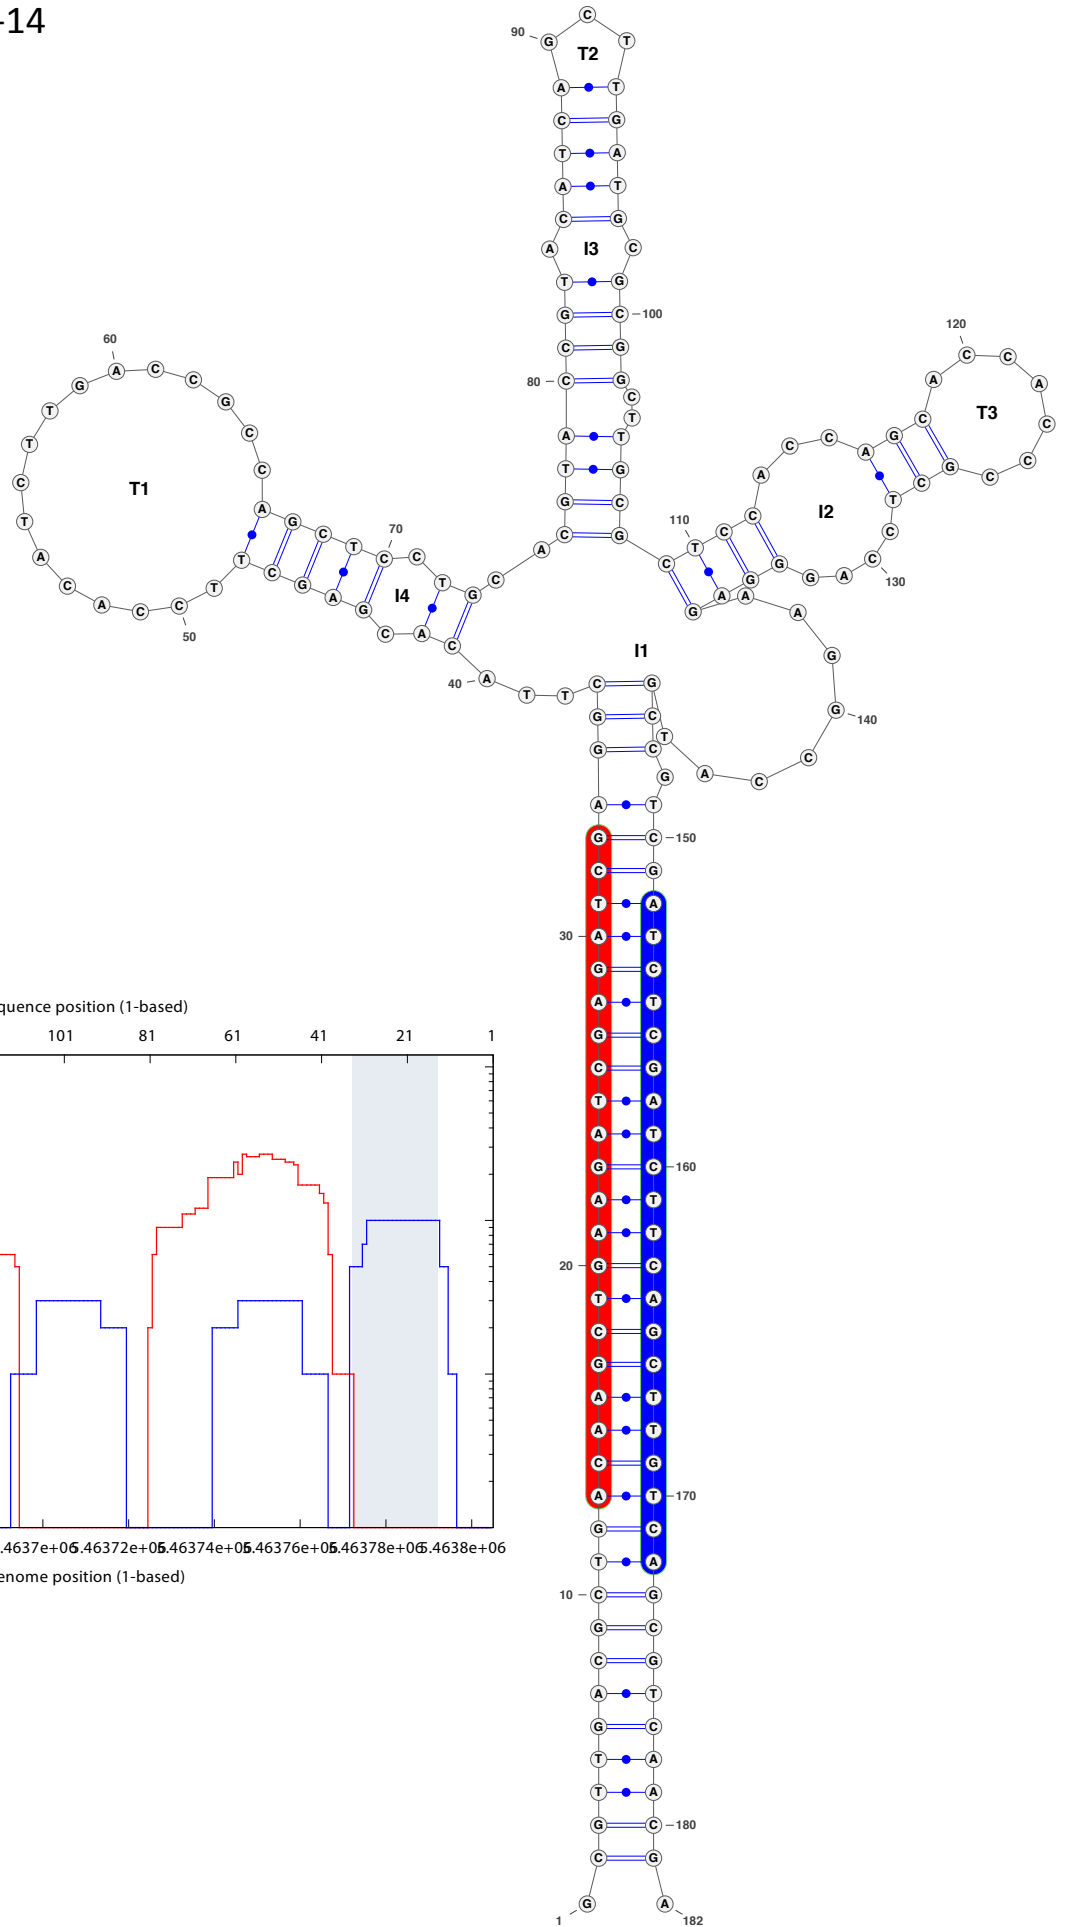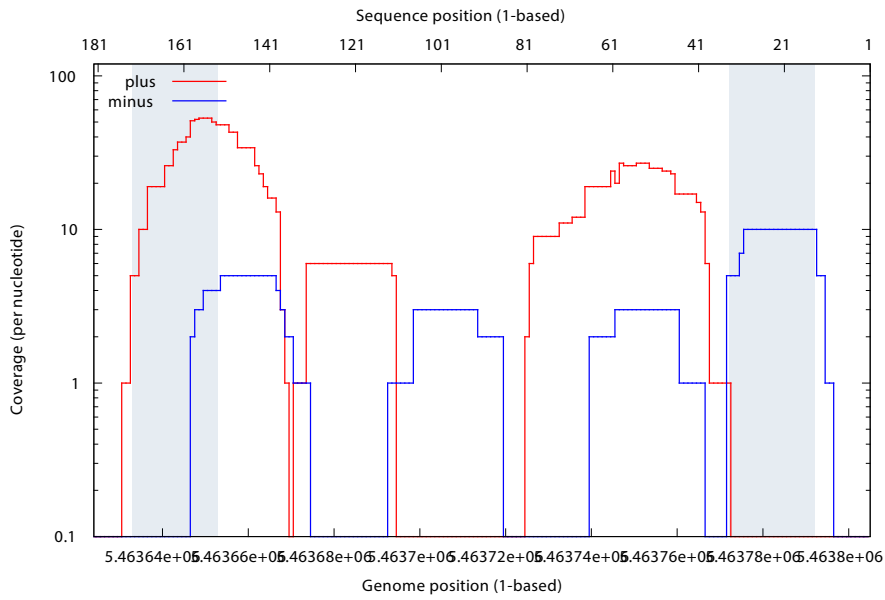

## Full list of identified miRNAs in *Volvox carteri*

Table S4: Full list of 213 identified miRNAs in *Volvox carteri* from miRA. For details, see section **Results and discussion** in the main paper.

| Name       | Scaffold     | Start    | Stop     | Strand |
|------------|--------------|----------|----------|--------|
| vca-mir-1  | scaffold_1   | 3025666  | 3025841  | plus   |
| vca-mir-2  | scaffold_1   | 3115004  | 3115278  | minus  |
| vca-mir-3  | scaffold_1   | 3120004  | 3120203  | plus   |
| vca-mir-4  | scaffold_1   | 3120004  | 3120203  | minus  |
| vca-mir-5  | scaffold_1   | 3763375  | 3763592  | minus  |
| vca-mir-6  | scaffold_1   | 4501926  | 4502219  | plus   |
| vca-mir-7  | scaffold_1   | 4503209  | 4503443  | plus   |
| vca-mir-8  | scaffold_1   | 4513619  | 4513956  | plus   |
| vca-mir-9  | scaffold_1   | 4513637  | 4513960  | minus  |
| vca-mir-10 | scaffold_1   | 7263654  | 7263960  | plus   |
| vca-mir-11 | scaffold_1   | 7263655  | 7263961  | minus  |
| vca-mir-12 | scaffold_1   | 10097708 | 10097959 | plus   |
| vca-mir-13 | scaffold_1   | 11949608 | 11949820 | plus   |
| vca-mir-14 | scaffold_1   | 14147874 | 14148043 | plus   |
| vca-mir-15 | scaffold_100 | 67969    | 68168    | minus  |
| vca-mir-16 | scaffold_100 | 67969    | 68187    | plus   |
| vca-mir-17 | scaffold_101 | 5918     | 6017     | minus  |
| vca-mir-18 | scaffold_101 | 5931     | 6004     | plus   |
| vca-mir-19 | scaffold_101 | 6141     | 6379     | plus   |
| vca-mir-20 | scaffold_11  | 1036056  | 1036256  | plus   |
| vca-mir-21 | scaffold_11  | 2143080  | 2143398  | minus  |
| vca-mir-22 | scaffold_11  | 2192683  | 2192771  | plus   |
| vca-mir-23 | scaffold_11  | 2509131  | 2509452  | plus   |
| vca-mir-24 | scaffold_11  | 2513057  | 2513256  | minus  |
| vca-mir-25 | scaffold_11  | 2513057  | 2513257  | plus   |
| vca-mir-26 | scaffold_11  | 2924104  | 2924325  | minus  |
| vca-mir-27 | scaffold_11  | 2924121  | 2924342  | plus   |
| vca-mir-28 | scaffold_115 | 11620    | 11803    | minus  |
| vca-mir-29 | scaffold_115 | 11620    | 11803    | plus   |
| vca-mir-30 | scaffold_115 | 19808    | 20019    | plus   |
| vca-mir-31 | scaffold_118 | 13205    | 13416    | plus   |
| vca-mir-32 | scaffold_12  | 484249   | 484353   | plus   |
| vca-mir-33 | scaffold_12  | 484249   | 484354   | minus  |
| vca-mir-34 | scaffold_12  | 516367   | 516757   | plus   |
| vca-mir-35 | scaffold_12  | 775620   | 775836   | plus   |
| vca-mir-36 | scaffold_13  | 238387   | 238650   | minus  |
| vca-mir-37 | scaffold_13  | 1572532  | 1572645  | minus  |
| vca-mir-38 | scaffold_13  | 1815683  | 1815876  | minus  |
| vca-mir-39 | scaffold_13  | 1815703  | 1815856  | plus   |
| vca-mir-40 | scaffold_14  | 1250672  | 1250763  | plus   |
| vca-mir-41 | scaffold_14  | 1765799  | 1765992  | plus   |
| vca-mir-42 | scaffold_14  | 1765802  | 1765989  | minus  |
| vca-mir-43 | scaffold_14  | 1987966  | 1988211  | minus  |
| vca-mir-44 | scaffold_14  | 1996254  | 1996453  | plus   |

Table S4 – *Continued from previous page*

| Name       | Scaffold     | Start   | Stop    | Strand |
|------------|--------------|---------|---------|--------|
| vca-mir-45 | scaffold_14  | 2667584 | 2667787 | minus  |
| vca-mir-46 | scaffold_14  | 2677641 | 2677775 | plus   |
| vca-mir-47 | scaffold_14  | 2823445 | 2823644 | minus  |
| vca-mir-48 | scaffold_14  | 2823445 | 2823644 | plus   |
| vca-mir-49 | scaffold_15  | 123468  | 123554  | minus  |
| vca-mir-50 | scaffold_15  | 1962855 | 1963181 | minus  |
| vca-mir-51 | scaffold_15  | 1962928 | 1963117 | plus   |
| vca-mir-52 | scaffold_16  | 1946027 | 1946250 | minus  |
| vca-mir-53 | scaffold_16  | 2354023 | 2354122 | plus   |
| vca-mir-54 | scaffold_17  | 1224    | 1483    | minus  |
| vca-mir-55 | scaffold_17  | 1224    | 1483    | plus   |
| vca-mir-56 | scaffold_17  | 589136  | 589570  | minus  |
| vca-mir-57 | scaffold_17  | 589178  | 589527  | plus   |
| vca-mir-58 | scaffold_17  | 2072270 | 2072371 | plus   |
| vca-mir-59 | scaffold_17  | 2385974 | 2386092 | minus  |
| vca-mir-60 | scaffold_172 | 10218   | 10429   | plus   |
| vca-mir-61 | scaffold_18  | 12152   | 12416   | minus  |
| vca-mir-62 | scaffold_18  | 12155   | 12412   | plus   |
| vca-mir-63 | scaffold_18  | 1515867 | 1516000 | plus   |
| vca-mir-64 | scaffold_18  | 1547269 | 1547500 | minus  |
| vca-mir-65 | scaffold_18  | 2313251 | 2313453 | minus  |
| vca-mir-66 | scaffold_18  | 2313251 | 2313471 | plus   |
| vca-mir-67 | scaffold_19  | 242527  | 242822  | plus   |
| vca-mir-68 | scaffold_19  | 337204  | 337554  | plus   |
| vca-mir-69 | scaffold_19  | 607130  | 607397  | minus  |
| vca-mir-70 | scaffold_19  | 607132  | 607399  | plus   |
| vca-mir-71 | scaffold_19  | 625886  | 625982  | minus  |
| vca-mir-72 | scaffold_19  | 1563079 | 1563322 | plus   |
| vca-mir-73 | scaffold_192 | 13497   | 13708   | minus  |
| vca-mir-74 | scaffold_2   | 5039346 | 5039726 | minus  |
| vca-mir-75 | scaffold_20  | 541197  | 541303  | minus  |
| vca-mir-76 | scaffold_20  | 559053  | 559155  | minus  |
| vca-mir-77 | scaffold_20  | 862311  | 862419  | minus  |
| vca-mir-78 | scaffold_20  | 1339809 | 1339892 | plus   |
| vca-mir-79 | scaffold_20  | 2215647 | 2215846 | minus  |
| vca-mir-80 | scaffold_21  | 113935  | 114140  | minus  |
| vca-mir-81 | scaffold_21  | 133967  | 134092  | plus   |
| vca-mir-82 | scaffold_21  | 181814  | 181945  | plus   |
| vca-mir-83 | scaffold_21  | 428236  | 428288  | minus  |
| vca-mir-84 | scaffold_21  | 2139205 | 2139550 | minus  |
| vca-mir-85 | scaffold_21  | 2139209 | 2139572 | plus   |
| vca-mir-86 | scaffold_22  | 2109078 | 2109183 | minus  |
| vca-mir-87 | scaffold_23  | 117103  | 117303  | minus  |
| vca-mir-88 | scaffold_23  | 990961  | 991166  | minus  |
| vca-mir-89 | scaffold_23  | 1323711 | 1324019 | minus  |
| vca-mir-90 | scaffold_23  | 1367272 | 1367576 | plus   |
| vca-mir-91 | scaffold_25  | 951408  | 951499  | plus   |
| vca-mir-92 | scaffold_25  | 1071163 | 1071405 | plus   |

Table S4 – *Continued from previous page*

| Name        | Scaffold     | Start   | Stop    | Strand |
|-------------|--------------|---------|---------|--------|
| vca-mir-93  | scaffold_25  | 1446715 | 1447018 | minus  |
| vca-mir-94  | scaffold_25  | 1446718 | 1447015 | plus   |
| vca-mir-95  | scaffold_26  | 1242759 | 1243037 | plus   |
| vca-mir-96  | scaffold_26  | 1420743 | 1420905 | minus  |
| vca-mir-97  | scaffold_26  | 1428370 | 1428615 | plus   |
| vca-mir-98  | scaffold_27  | 824315  | 824405  | plus   |
| vca-mir-99  | scaffold_27  | 1226683 | 1227081 | plus   |
| vca-mir-100 | scaffold_27  | 1279043 | 1279375 | plus   |
| vca-mir-101 | scaffold_27  | 1728267 | 1728558 | plus   |
| vca-mir-102 | scaffold_28  | 169736  | 170150  | minus  |
| vca-mir-103 | scaffold_3   | 77494   | 77609   | minus  |
| vca-mir-104 | scaffold_3   | 82231   | 82339   | minus  |
| vca-mir-105 | scaffold_3   | 87607   | 87708   | plus   |
| vca-mir-106 | scaffold_3   | 97754   | 97862   | minus  |
| vca-mir-107 | scaffold_3   | 139213  | 139321  | minus  |
| vca-mir-108 | scaffold_3   | 155129  | 155237  | minus  |
| vca-mir-109 | scaffold_3   | 554435  | 554786  | plus   |
| vca-mir-110 | scaffold_3   | 554505  | 554891  | minus  |
| vca-mir-111 | scaffold_3   | 1184724 | 1184842 | plus   |
| vca-mir-112 | scaffold_3   | 1937439 | 1937543 | plus   |
| vca-mir-113 | scaffold_3   | 4726162 | 4726380 | minus  |
| vca-mir-114 | scaffold_31  | 9572    | 9826    | minus  |
| vca-mir-115 | scaffold_31  | 452106  | 452305  | minus  |
| vca-mir-116 | scaffold_31  | 452106  | 452324  | plus   |
| vca-mir-117 | scaffold_31  | 691972  | 692175  | minus  |
| vca-mir-118 | scaffold_31  | 691972  | 692192  | plus   |
| vca-mir-119 | scaffold_31  | 713210  | 713523  | plus   |
| vca-mir-120 | scaffold_31  | 1552230 | 1552328 | plus   |
| vca-mir-121 | scaffold_32  | 39278   | 39376   | minus  |
| vca-mir-122 | scaffold_32  | 832926  | 833027  | plus   |
| vca-mir-123 | scaffold_32  | 1250240 | 1250345 | minus  |
| vca-mir-124 | scaffold_321 | 2279    | 2530    | plus   |
| vca-mir-125 | scaffold_321 | 6539    | 6736    | minus  |
| vca-mir-126 | scaffold_321 | 6540    | 6736    | plus   |
| vca-mir-127 | scaffold_33  | 884153  | 884439  | plus   |
| vca-mir-128 | scaffold_38  | 65875   | 66093   | plus   |
| vca-mir-129 | scaffold_38  | 275360  | 275547  | plus   |
| vca-mir-130 | scaffold_38  | 288165  | 288270  | minus  |
| vca-mir-131 | scaffold_38  | 359448  | 359649  | plus   |
| vca-mir-132 | scaffold_38  | 594448  | 594794  | plus   |
| vca-mir-133 | scaffold_39  | 716204  | 716362  | minus  |
| vca-mir-134 | scaffold_4   | 224250  | 224506  | minus  |
| vca-mir-135 | scaffold_4   | 2375489 | 2375563 | plus   |
| vca-mir-136 | scaffold_4   | 3167788 | 3168030 | minus  |
| vca-mir-137 | scaffold_4   | 3336855 | 3337037 | minus  |
| vca-mir-138 | scaffold_4   | 3520094 | 3520455 | plus   |
| vca-mir-139 | scaffold_4   | 3601379 | 3601597 | plus   |
| vca-mir-140 | scaffold_4   | 4114603 | 4114936 | plus   |

Table S4 – *Continued from previous page*

| Name        | Scaffold    | Start   | Stop    | Strand |
|-------------|-------------|---------|---------|--------|
| vca-mir-141 | scaffold_41 | 458529  | 458781  | plus   |
| vca-mir-142 | scaffold_42 | 98359   | 98556   | plus   |
| vca-mir-143 | scaffold_45 | 745780  | 745868  | plus   |
| vca-mir-144 | scaffold_47 | 10506   | 10717   | minus  |
| vca-mir-145 | scaffold_47 | 84779   | 84979   | minus  |
| vca-mir-146 | scaffold_47 | 236744  | 236906  | minus  |
| vca-mir-147 | scaffold_47 | 237389  | 237493  | minus  |
| vca-mir-148 | scaffold_47 | 256972  | 257191  | minus  |
| vca-mir-149 | scaffold_47 | 256991  | 257190  | plus   |
| vca-mir-150 | scaffold_48 | 145579  | 145696  | minus  |
| vca-mir-151 | scaffold_49 | 596376  | 596476  | minus  |
| vca-mir-152 | scaffold_5  | 788647  | 788882  | minus  |
| vca-mir-153 | scaffold_5  | 3532896 | 3533138 | minus  |
| vca-mir-154 | scaffold_5  | 3611611 | 3611927 | minus  |
| vca-mir-155 | scaffold_5  | 3751466 | 3751719 | minus  |
| vca-mir-156 | scaffold_5  | 4012909 | 4013178 | minus  |
| vca-mir-157 | scaffold_51 | 123857  | 124099  | plus   |
| vca-mir-158 | scaffold_51 | 123876  | 124081  | minus  |
| vca-mir-159 | scaffold_51 | 577942  | 578066  | plus   |
| vca-mir-160 | scaffold_52 | 157122  | 157285  | minus  |
| vca-mir-161 | scaffold_54 | 535426  | 535531  | minus  |
| vca-mir-162 | scaffold_56 | 431917  | 432264  | plus   |
| vca-mir-163 | scaffold_58 | 276858  | 277139  | plus   |
| vca-mir-164 | scaffold_58 | 276877  | 277122  | minus  |
| vca-mir-165 | scaffold_58 | 367025  | 367187  | minus  |
| vca-mir-166 | scaffold_58 | 367025  | 367187  | plus   |
| vca-mir-167 | scaffold_6  | 842730  | 843033  | plus   |
| vca-mir-168 | scaffold_6  | 931107  | 931365  | minus  |
| vca-mir-169 | scaffold_6  | 1377954 | 1378242 | minus  |
| vca-mir-170 | scaffold_61 | 371712  | 371958  | minus  |
| vca-mir-171 | scaffold_61 | 372089  | 372166  | minus  |
| vca-mir-172 | scaffold_63 | 278358  | 278625  | plus   |
| vca-mir-173 | scaffold_63 | 278358  | 278625  | minus  |
| vca-mir-174 | scaffold_7  | 12327   | 12538   | minus  |
| vca-mir-175 | scaffold_7  | 242533  | 242635  | minus  |
| vca-mir-176 | scaffold_70 | 142310  | 142521  | plus   |
| vca-mir-177 | scaffold_71 | 22645   | 22743   | minus  |
| vca-mir-178 | scaffold_72 | 37063   | 37283   | plus   |
| vca-mir-179 | scaffold_72 | 54385   | 54628   | minus  |
| vca-mir-180 | scaffold_74 | 244784  | 244870  | plus   |
| vca-mir-181 | scaffold_74 | 256120  | 256353  | plus   |
| vca-mir-182 | scaffold_76 | 165394  | 165519  | plus   |
| vca-mir-183 | scaffold_8  | 379884  | 380141  | minus  |
| vca-mir-184 | scaffold_8  | 1277759 | 1278126 | minus  |
| vca-mir-185 | scaffold_8  | 1277835 | 1278161 | plus   |
| vca-mir-186 | scaffold_8  | 1385271 | 1385622 | plus   |
| vca-mir-187 | scaffold_8  | 1385676 | 1386002 | plus   |
| vca-mir-188 | scaffold_8  | 2206685 | 2206890 | minus  |



Table S4 – *Continued from previous page*

| Name        | Scaffold     | Start   | Stop    | Strand |
|-------------|--------------|---------|---------|--------|
| vca-mir-189 | scaffold_8   | 2206707 | 2206889 | plus   |
| vca-mir-190 | scaffold_81  | 102237  | 102517  | plus   |
| vca-mir-191 | scaffold_84  | 21462   | 21652   | minus  |
| vca-mir-192 | scaffold_84  | 73479   | 73584   | minus  |
| vca-mir-193 | scaffold_84  | 117100  | 117320  | minus  |
| vca-mir-194 | scaffold_84  | 117120  | 117319  | plus   |
| vca-mir-195 | scaffold_85  | 25755   | 25859   | minus  |
| vca-mir-196 | scaffold_85  | 115486  | 115764  | minus  |
| vca-mir-197 | scaffold_85  | 115488  | 115764  | plus   |
| vca-mir-198 | scaffold_85  | 195028  | 195327  | minus  |
| vca-mir-199 | scaffold_85  | 197027  | 197207  | plus   |
| vca-mir-200 | scaffold_86  | 124094  | 124227  | plus   |
| vca-mir-201 | scaffold_86  | 124477  | 124649  | minus  |
| vca-mir-202 | scaffold_9   | 3505583 | 3505767 | plus   |
| vca-mir-203 | scaffold_90  | 11903   | 12102   | minus  |
| vca-mir-204 | scaffold_93  | 137718  | 137930  | plus   |
| vca-mir-205 | scaffold_93  | 140763  | 140890  | plus   |
| vca-mir-206 | scaffold_936 | 1719    | 1930    | plus   |
| vca-mir-207 | scaffold_94  | 1933    | 2102    | plus   |
| vca-mir-208 | scaffold_94  | 42923   | 43013   | plus   |
| vca-mir-209 | scaffold_94  | 146810  | 146915  | minus  |
| vca-mir-210 | scaffold_95  | 21817   | 22000   | plus   |
| vca-mir-211 | scaffold_95  | 28955   | 29154   | minus  |
| vca-mir-212 | scaffold_95  | 75892   | 76111   | minus  |
| vca-mir-213 | scaffold_97  | 123142  | 123240  | plus   |

## Validation of putative miRNAs in *Volvox carteri*

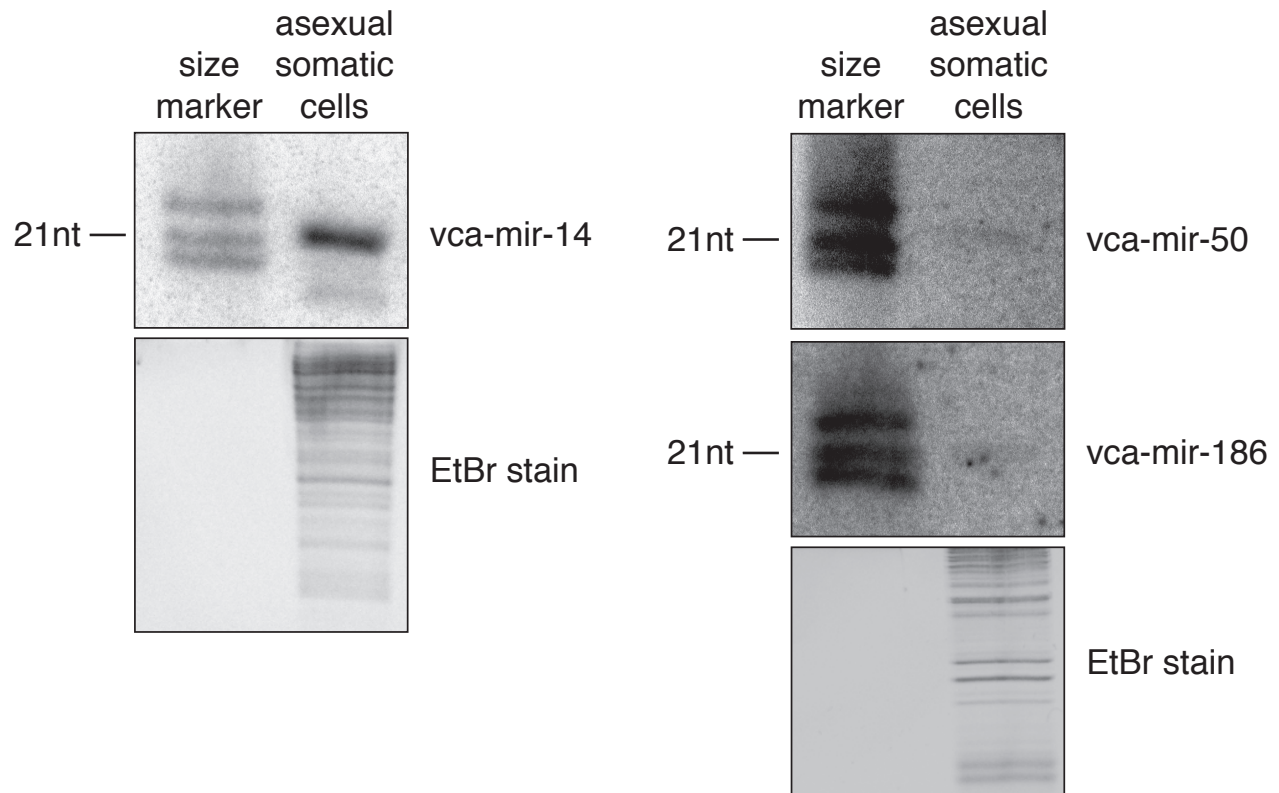

Figure S3: Total RNA from somatic cells was isolated and Northern blots were performed on randomly picked miRNA candidates from Table S4. A radioactively labeled size marker with the sizes of 19 nt, 21 nt and 24 nt was loaded as reference. Lower panel shows the ethidium bromide stain of the corresponding gel to control RNA integrity.

## References

- [1] Attila Molnár, Frank Schwach, David J Studholme, Eva C Thuenemann, and David C Baulcombe. miRNAs control gene expression in the single-cell alga *Chlamydomonas reinhardtii*. *Nature*, 447(7148):1126–1129, May 2007.
